# Supplementary material
Source: publisher figshare collection journal article supplement (https://acs.figshare.com/ndownloader/files/4729855)
Supplement: Supplementary file 1 [file 4729855]

## Supporting Information

### Electrochemical Self-Assembly of ZnO Nanoporous Structures

Gao-Ren Li,<sup>†‡\*</sup> Ci-Ren Dawa,<sup>†</sup> Qiong Bu,<sup>†</sup> Xi-Hong Lu,<sup>†</sup> Zhi-Hai Ke,<sup>†</sup> Hai-En Hong,<sup>†</sup> Fu-lin Zhen,<sup>†</sup> Chen-Zhong Yao,<sup>†</sup> Guan-Kun Liu,<sup>†</sup> and Ye-Xiang Tong<sup>†\*</sup>

<sup>†</sup> *MOE of Key Laboratory of Bioinorganic and Synthetic Chemistry/School of Chemistry and Chemical Engineering / Institute of Optoelectronic and Functional Composite Materials/Sun Yat-Sen University, Guangzhou 510275, P. R. China*

<sup>‡</sup> *State Key Lab of Rare Earth Materials Chemistry and Applications, Beijing 100871, P. R. China*

E-mail: [ligaoren@yahoo.com.cn](mailto:ligaoren@yahoo.com.cn)

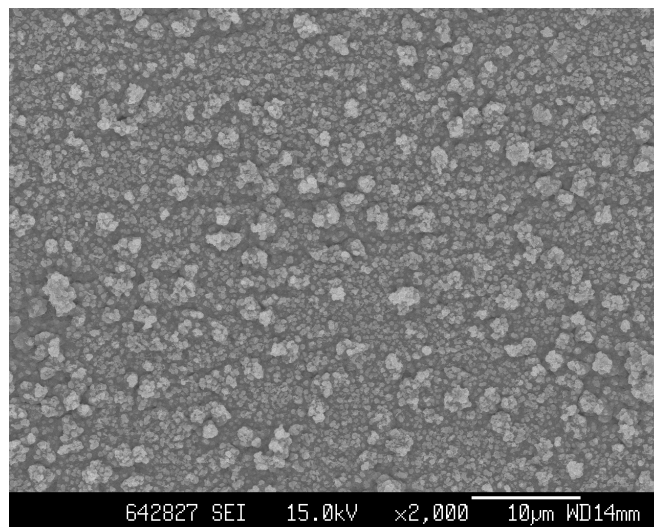

**Figure S1.** SEM image of ZnO film electrodeposited without EDTA.

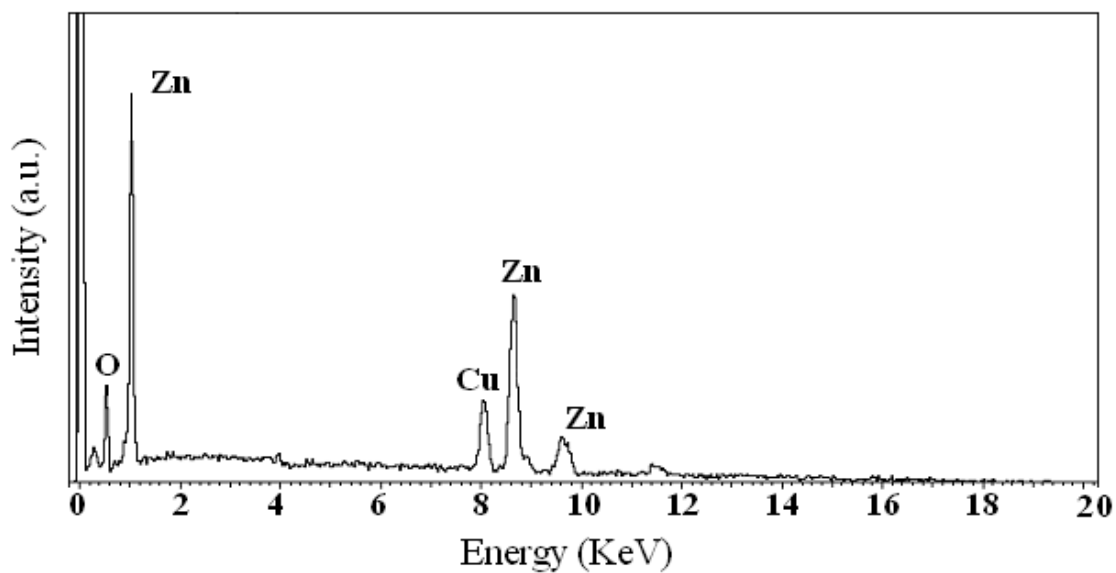

**Figure S2.** EDS of the sample electrodeposited with current density of  $1.0 \text{ mA/cm}^2$ . (O : Zn is about 1 : 1.5)

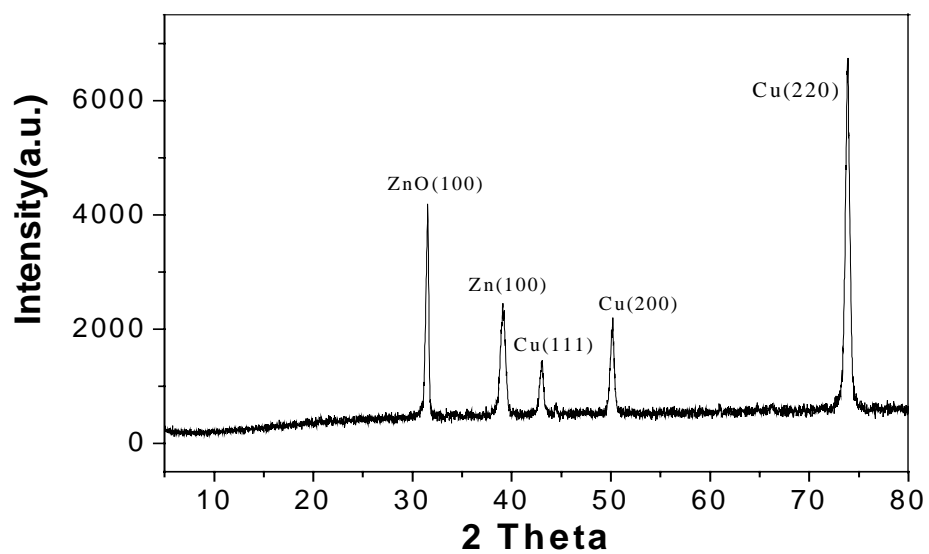

**Figure S3.** XRD of the samples electrodeposited with current density of  $1.0 \text{ mA/cm}^2$ .
